# Supplementary material
Source: PubMed Central journal article supplement (PMC4122215)

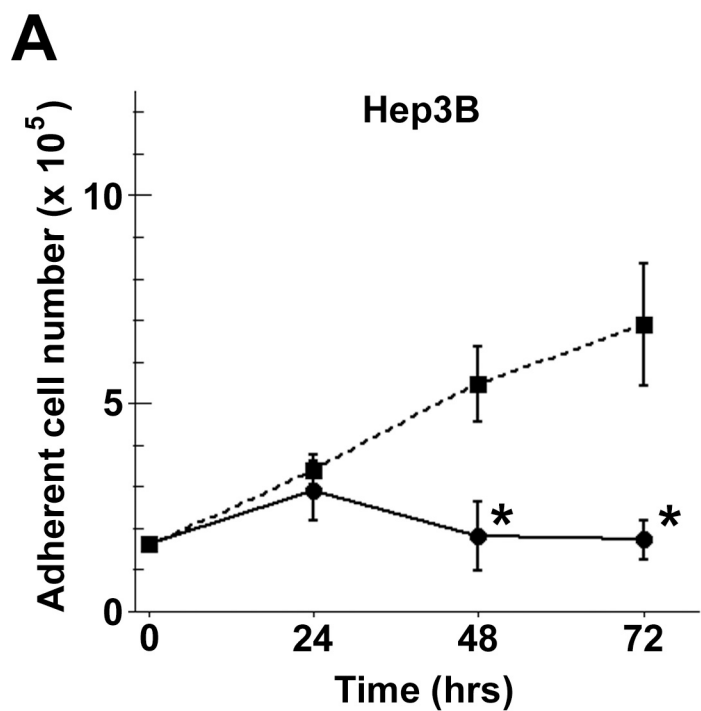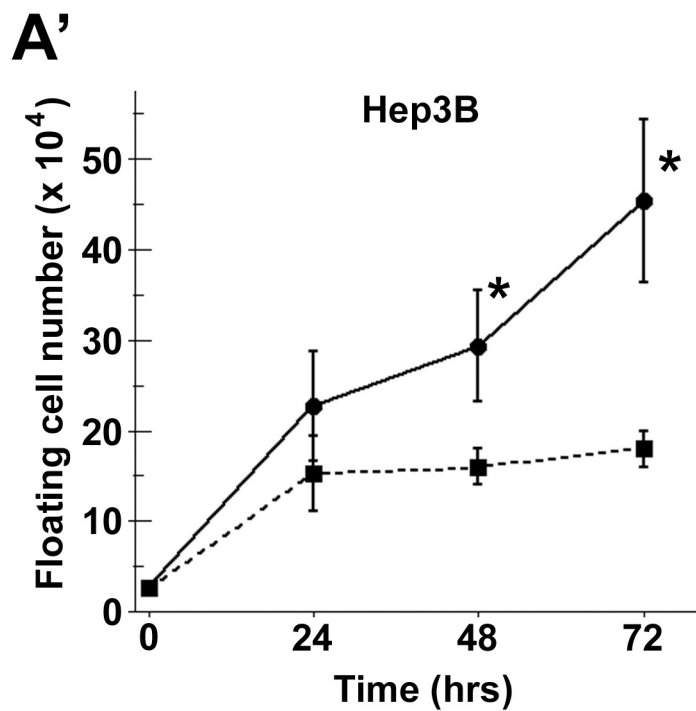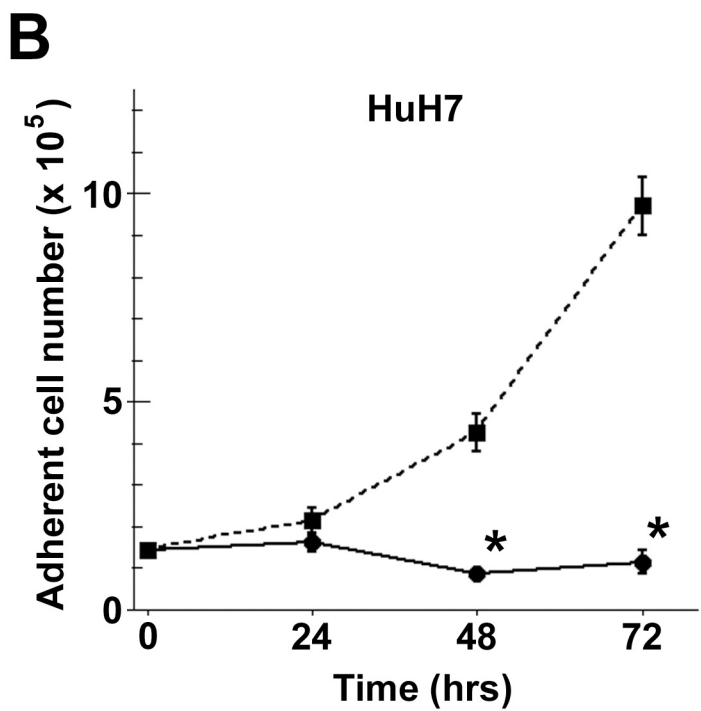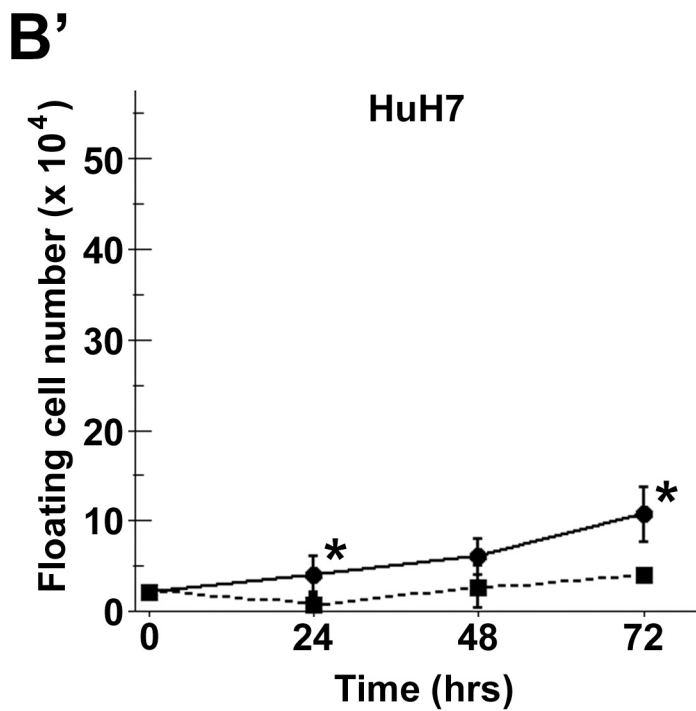

Supplement: NIHMS608173-supplement-Supplementary_Figure_1.pdf [file NIHMS608173-supplement-Supplementary_Figure_1.pdf]
